# Supplementary material for: Partial Dominance, Overdominance, Epistasis and QTL by Environment Interactions Contribute to Heterosis in Two Upland Cotton Hybrids
Source: PubMed Central journal article supplement (PMC4777113; doi:10.1534/g3.115.025809), 2015-12-29
Supplement: supp_g3.115.025809_FigureS1.pdf [file supp_g3.115.025809_FigureS1.pdf]

### Chr01 XZ

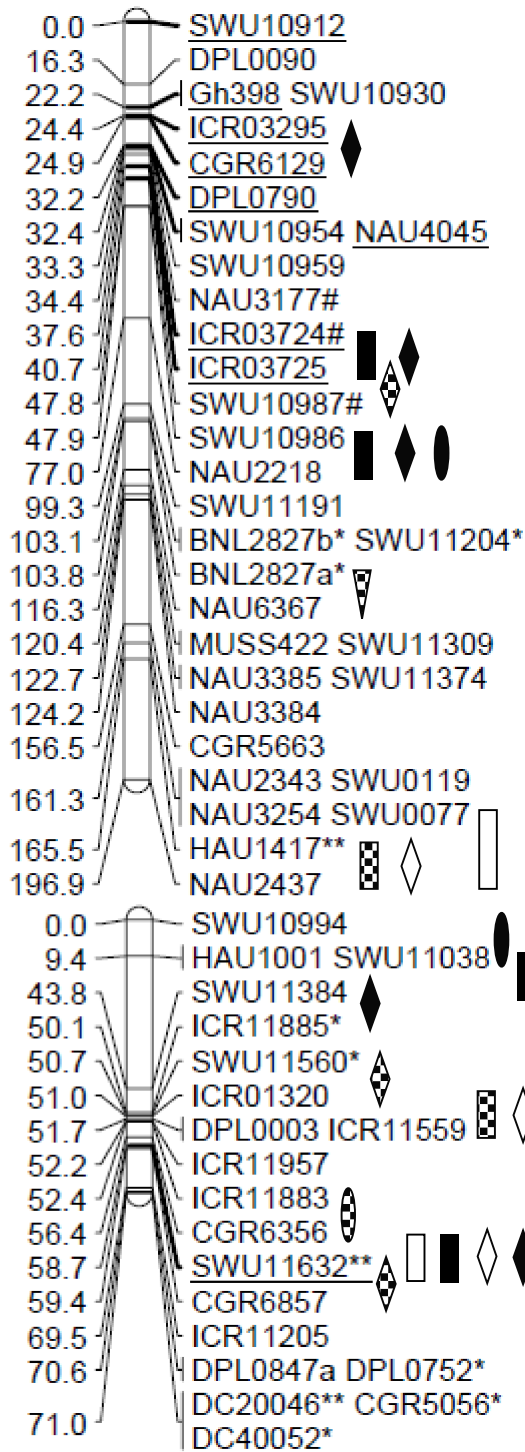

### Chr01 XZV

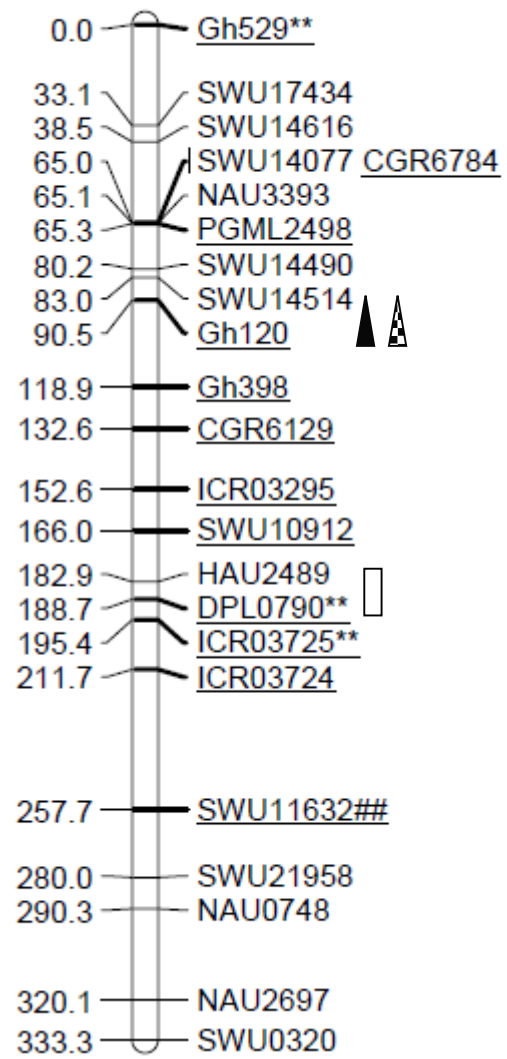

### Chr2 XZ

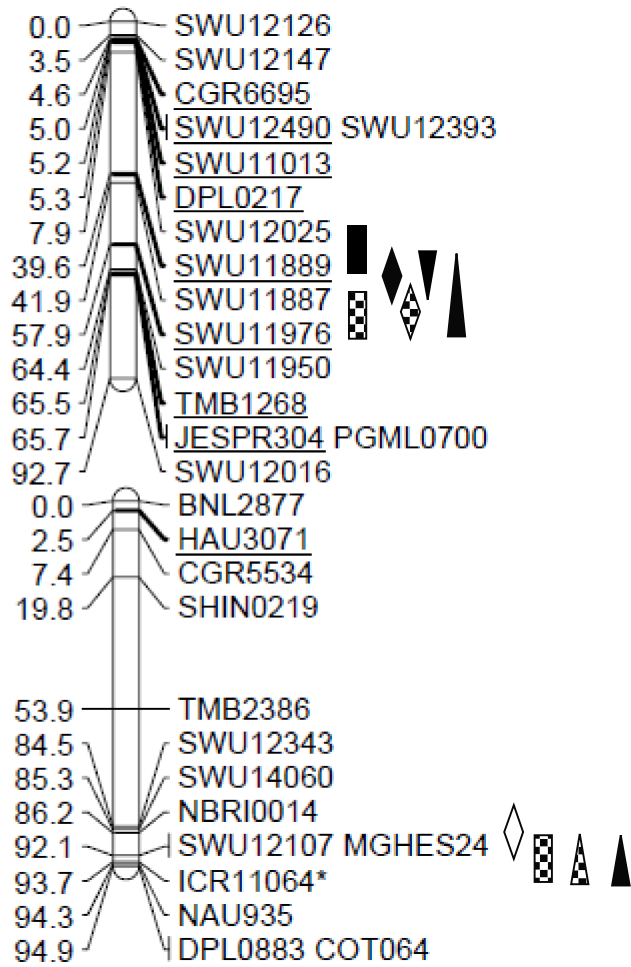

### Chr02 XZV

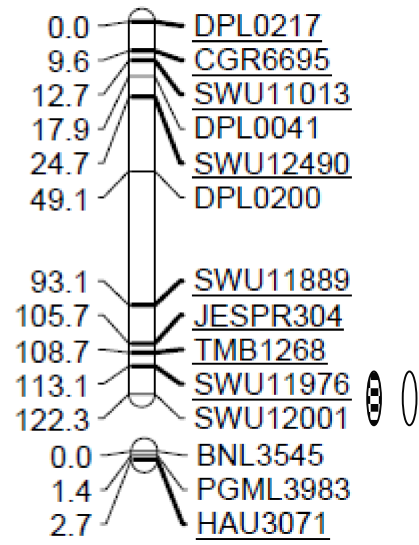

### Chr3 XZ

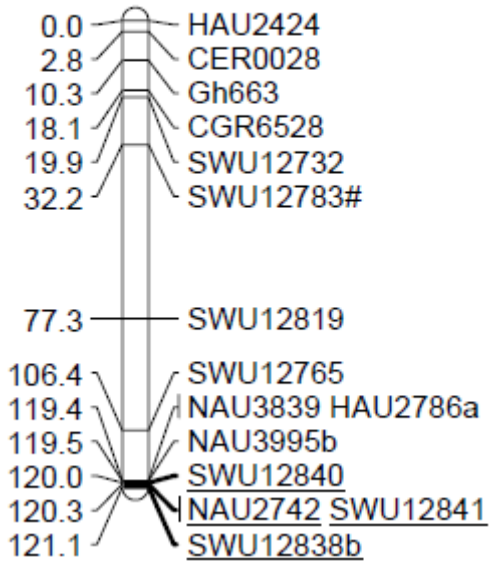

### Chr03 XZV

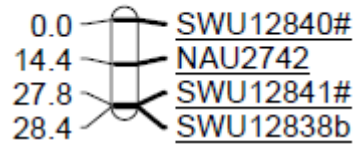

### Chr4 XZ

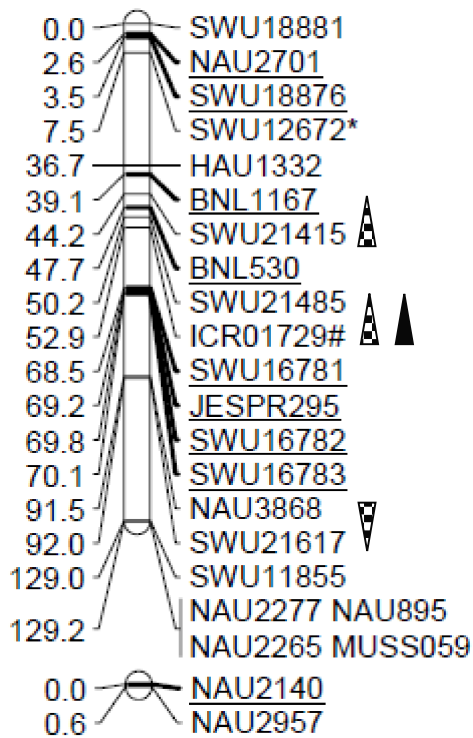

### Chr04 XZV

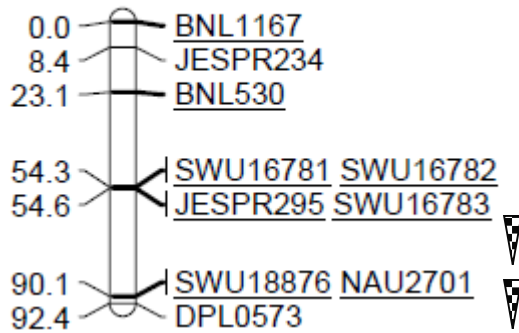

### Chr5 XZ

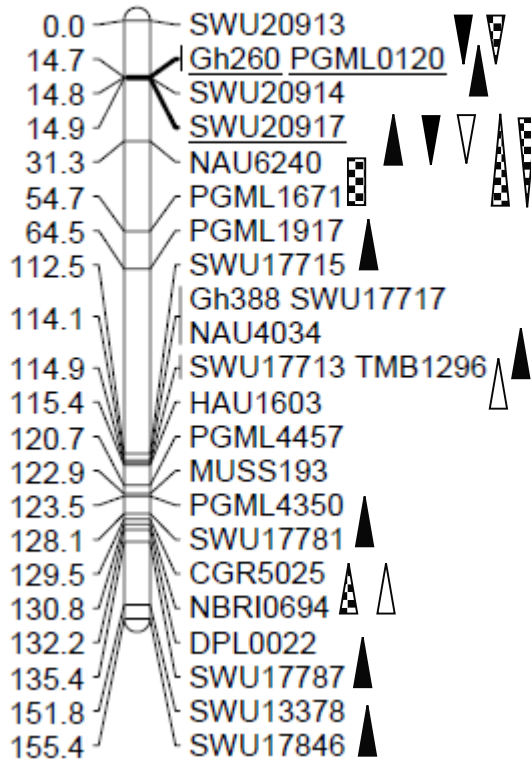

### Chr05 XZV

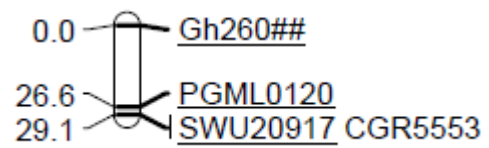

### Chr6 XZ

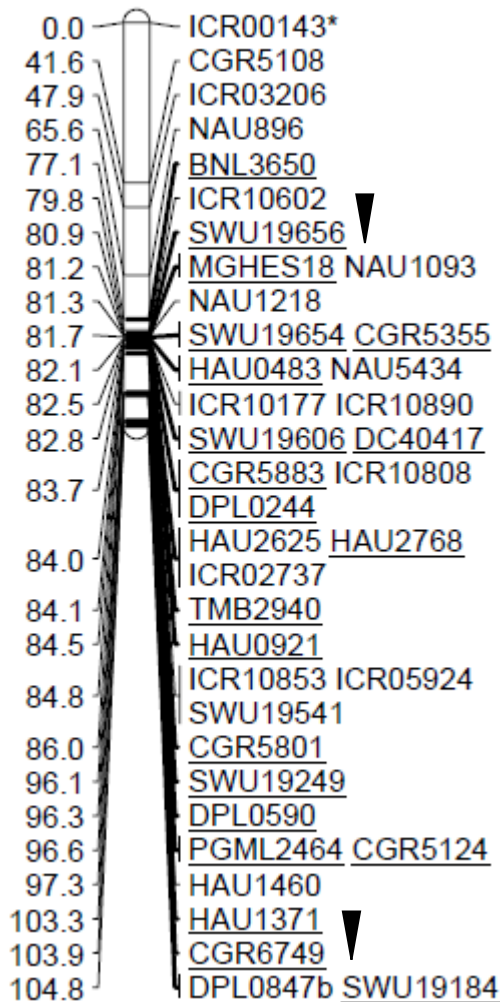

### Chr06 XZV

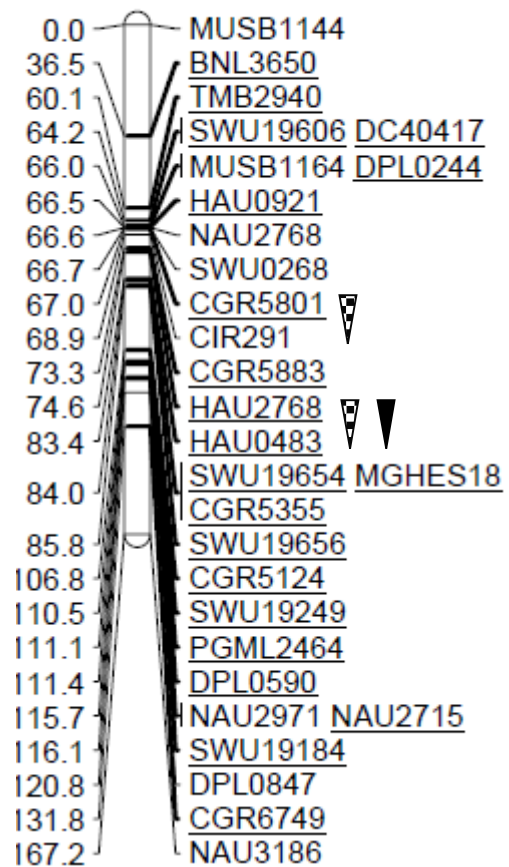

### Chr7 XZ

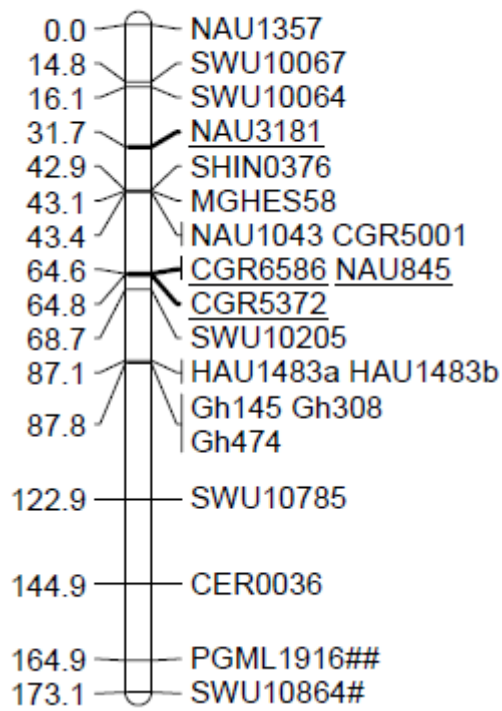

### Chr07 XZV

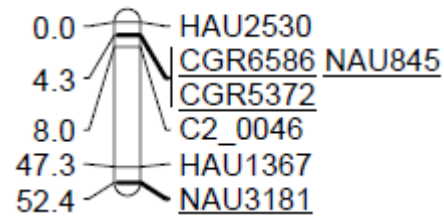

### Chr8 XZ

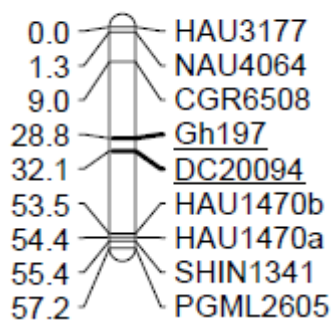

### Chr08 XZV

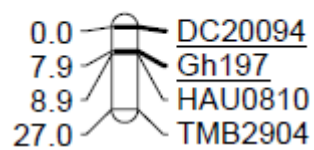

### Chr9 xZ

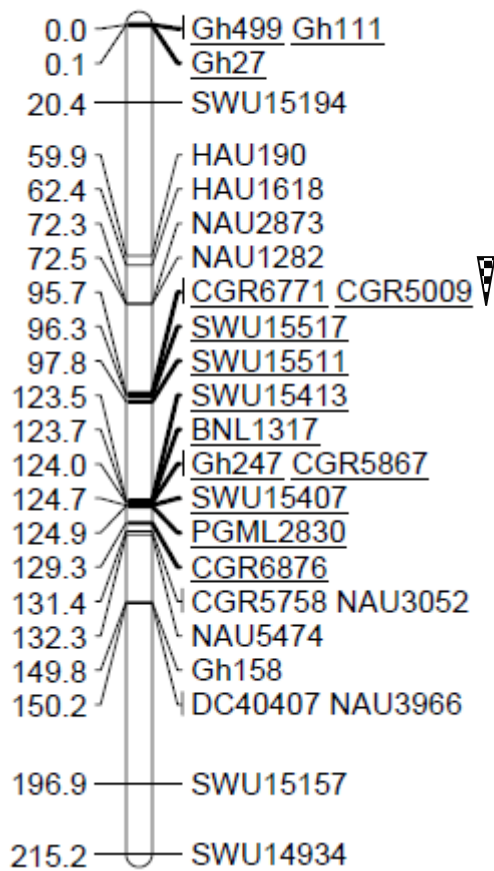

### Chr09 xZV

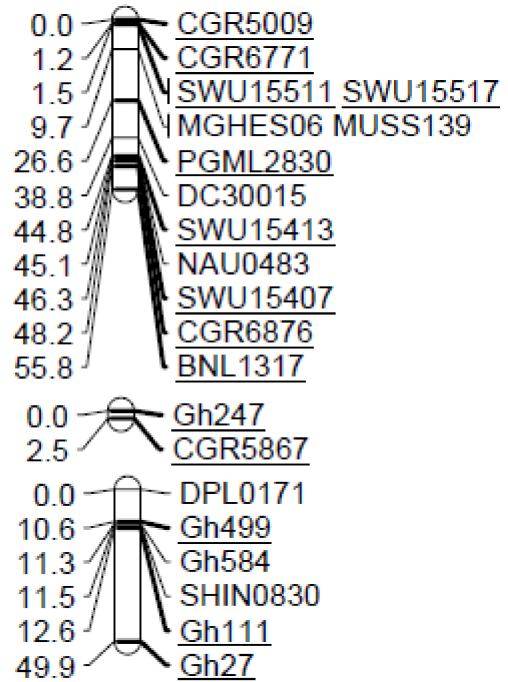

### Chr10 xZ

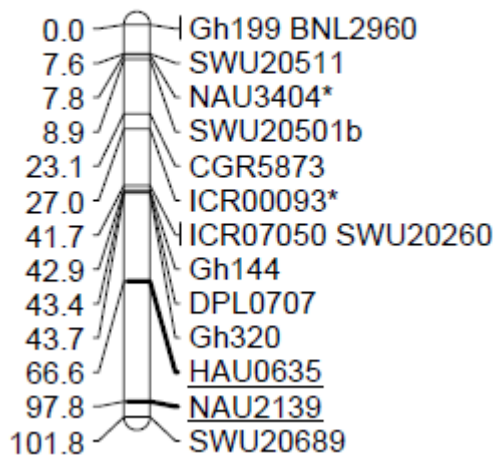

### Chr10 xZV

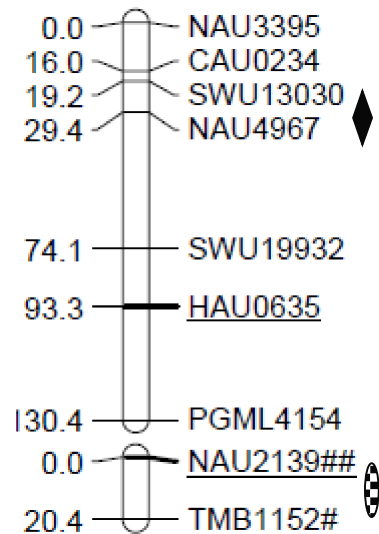



### Chr11 XZ

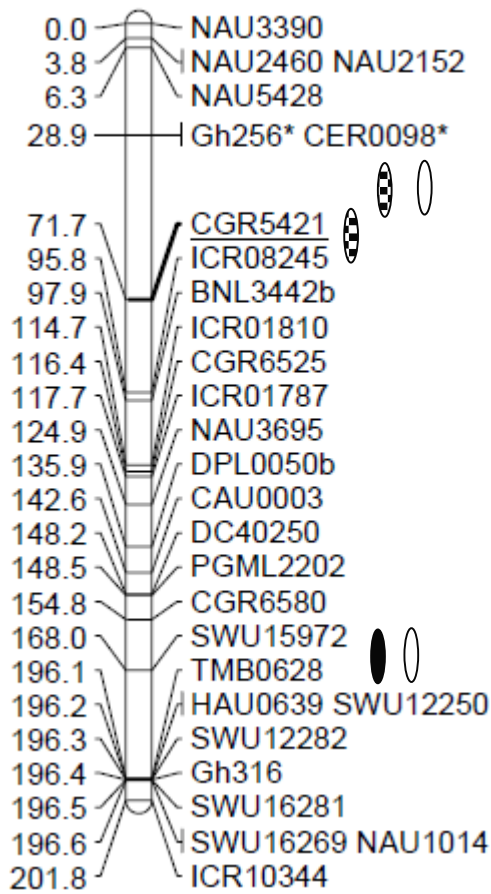

### Chr11 XZV

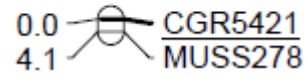

### Chr12 XZ

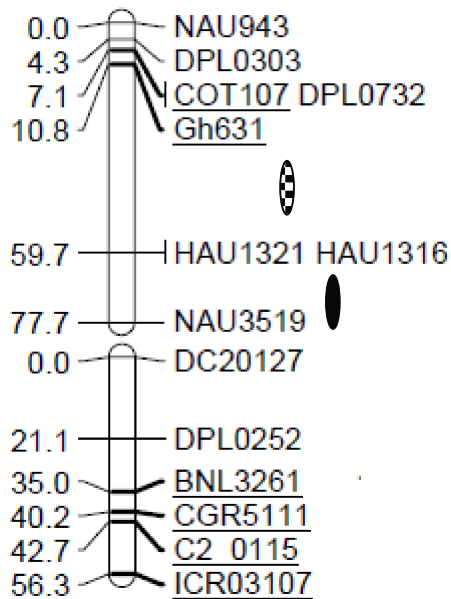

### Chr12 XZV

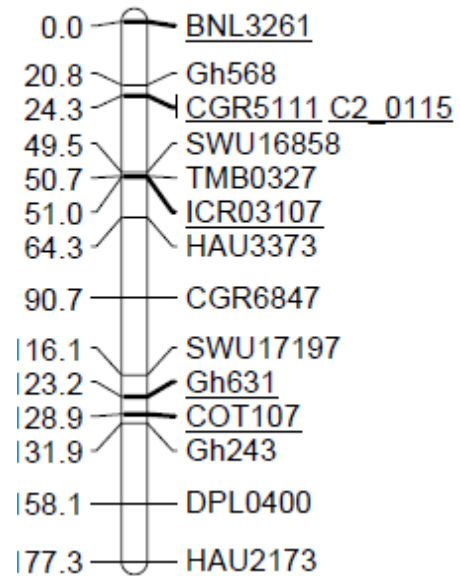

### Chr13 XZ

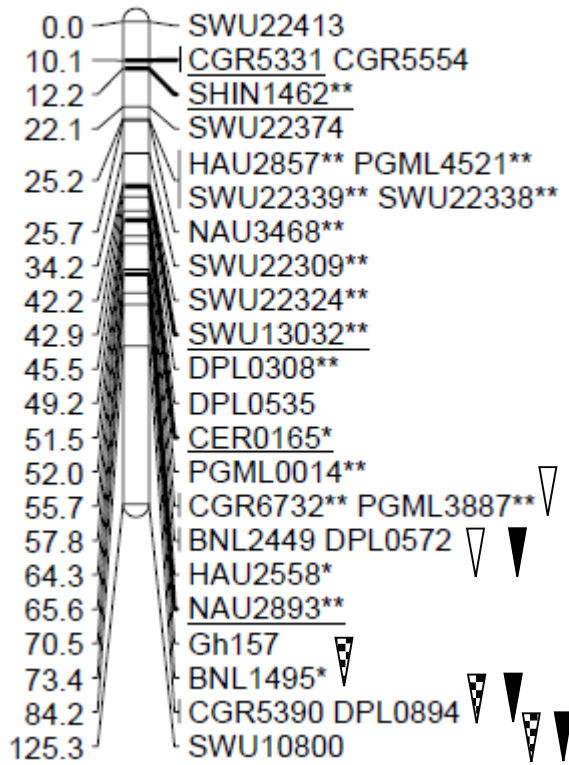

### Chr13 XZV

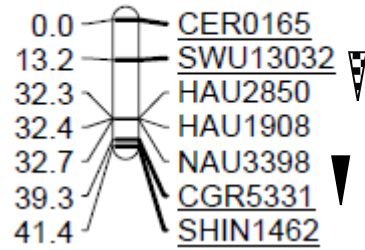

### Chr14 XZ

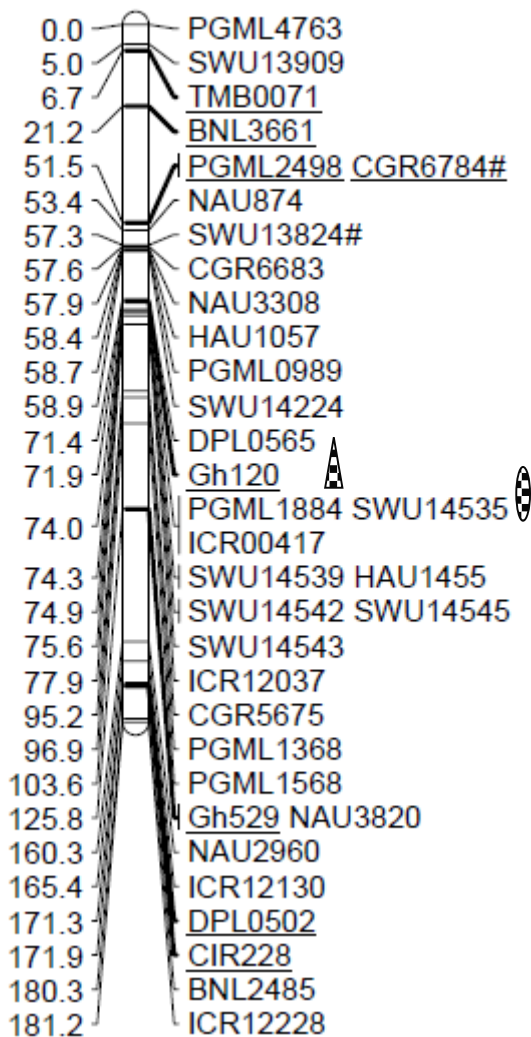

### Chr14 XZV

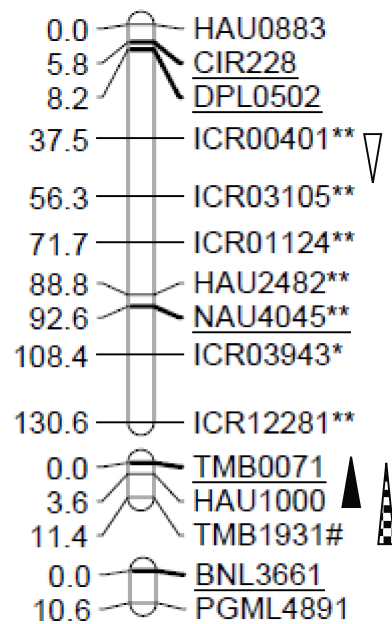



### Chr15 XZ

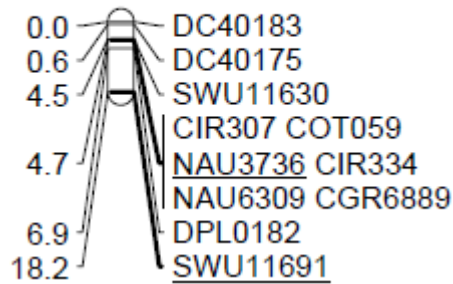

### Chr15 XZV

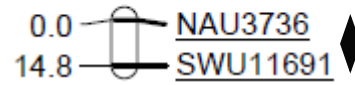

### Chr16 XZ

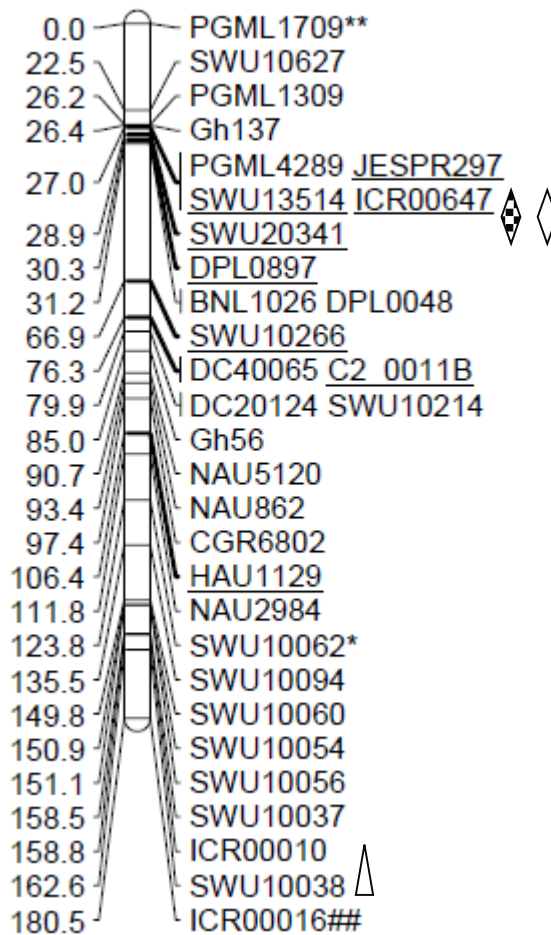

### Chr16 XZV

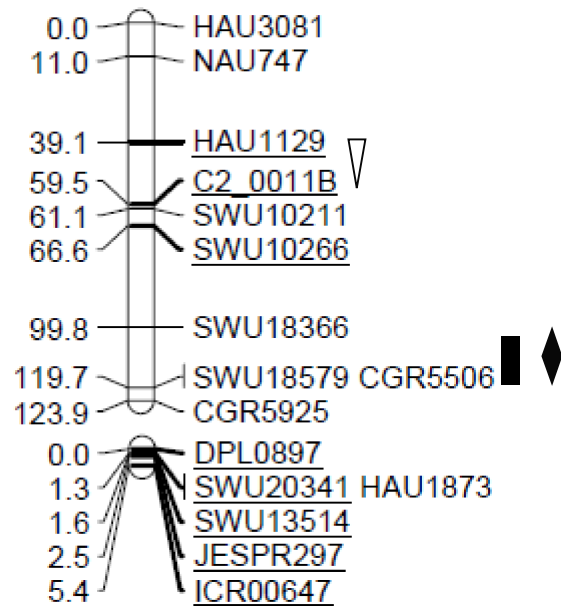

### Chr17 XZ

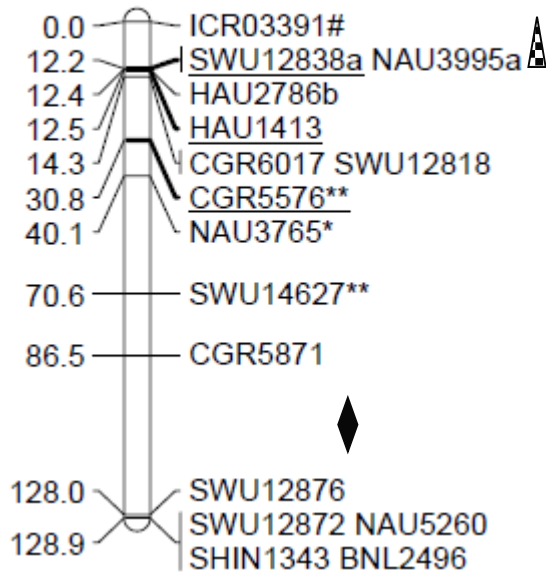

### Chr17 XZV

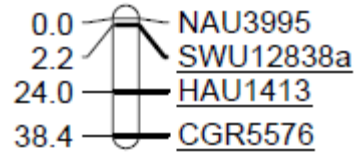

### Chr18 XZ

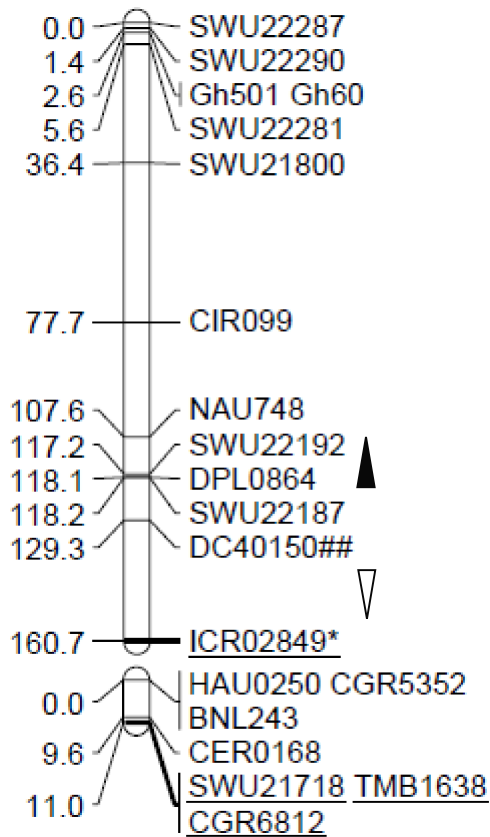

### Chr18 XZV

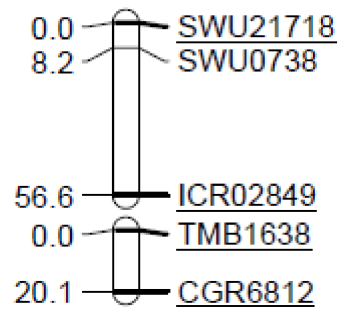

### Chr19 XZ

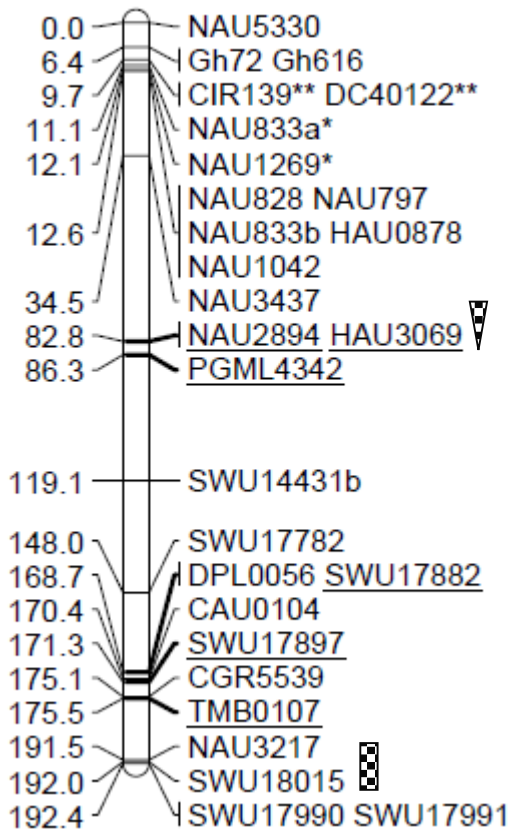

### Chr19 XZV

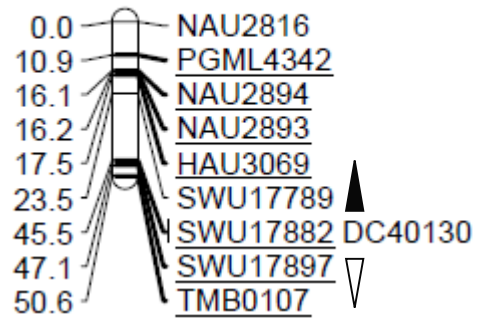

### Chr20 XZ

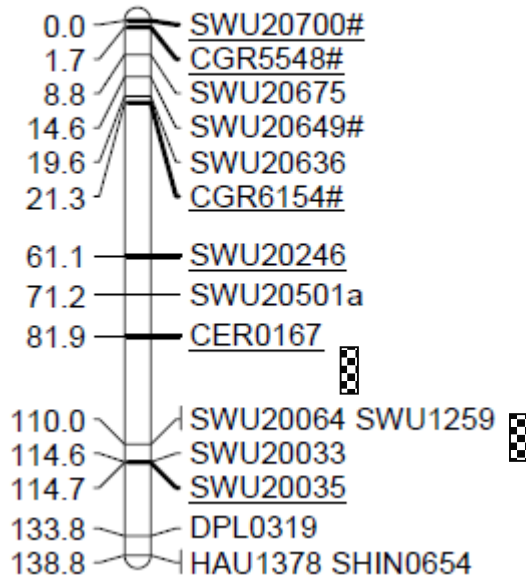

### Chr20 XZV

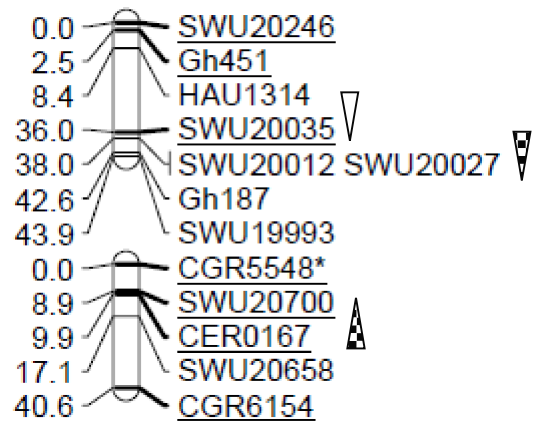

### Chr21 XZ

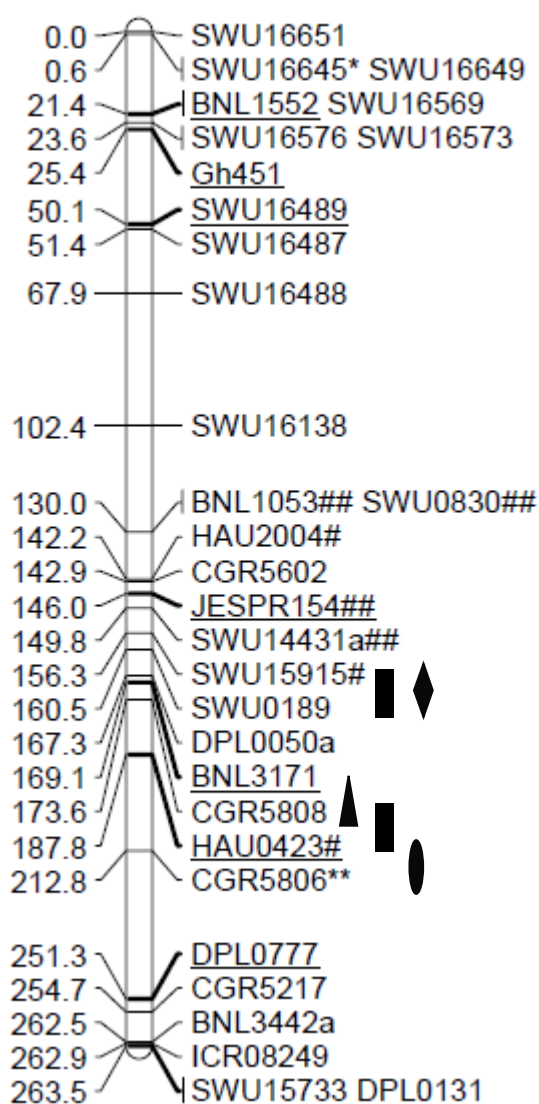

### Chr21 XZV

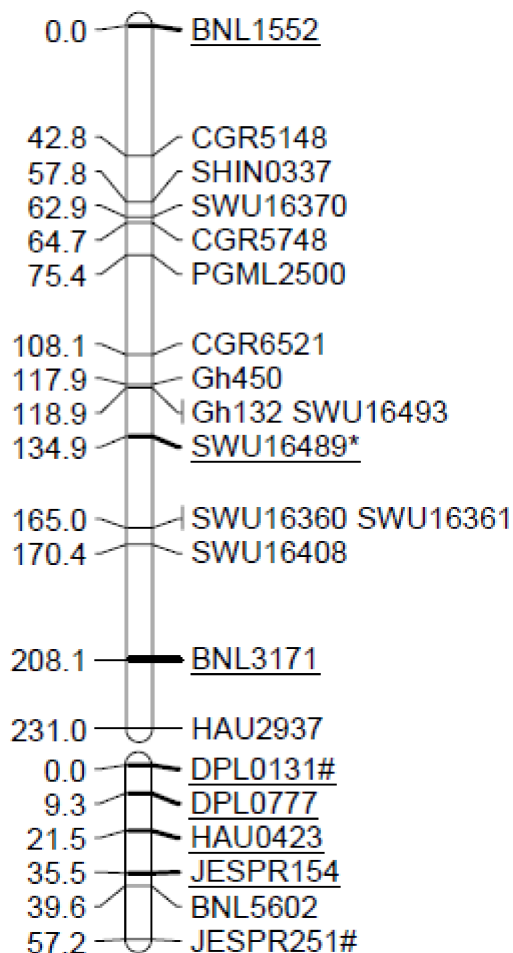

### Chr22 XZ

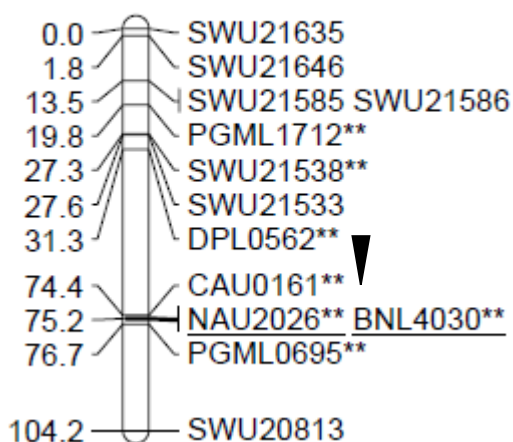

### Chr22 XZV

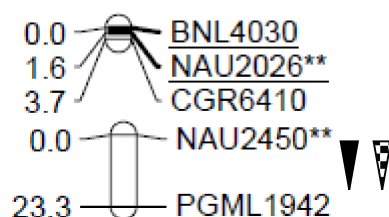

### Chr23 xZ

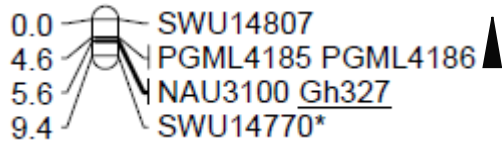

### Chr23 xZV

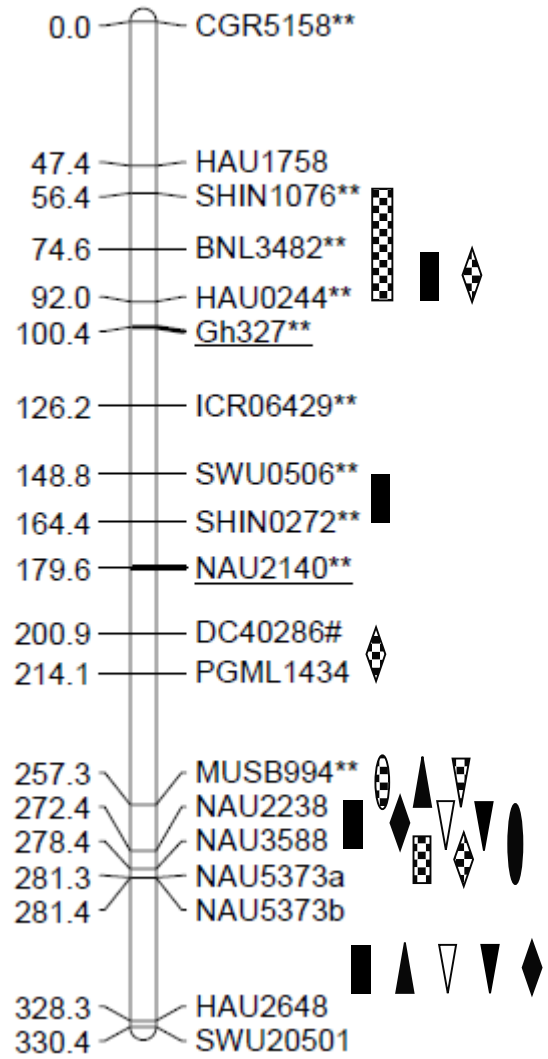

### Chr24 xZ

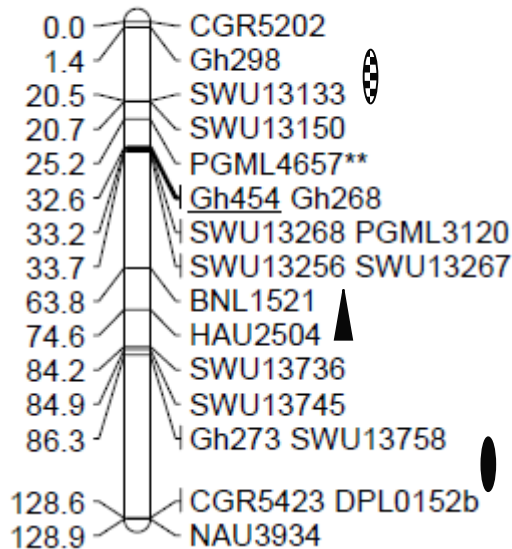

### Chr24 xZV

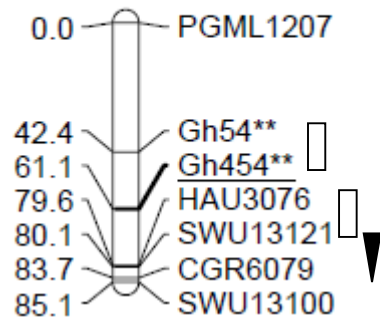



### Chr25 XZ

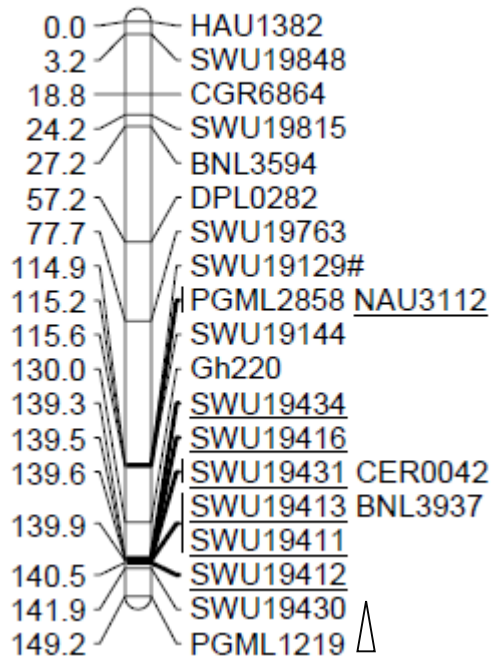

### Chr25 XZV

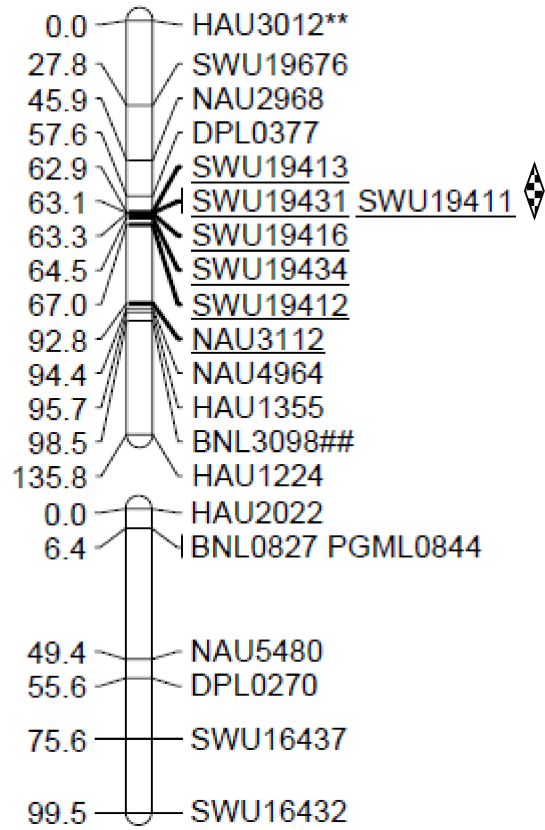

### Chr26 XZ

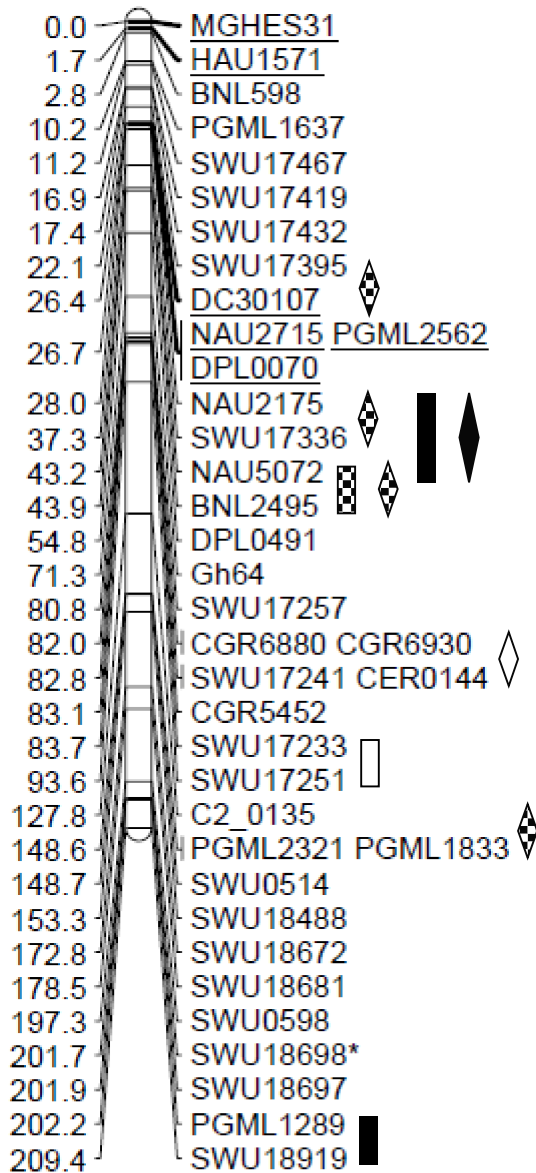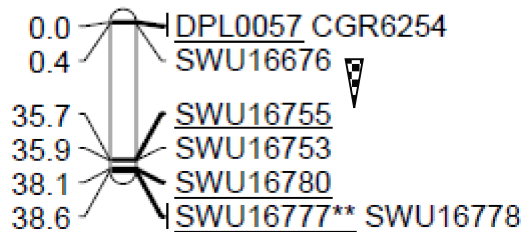

### Chr26 XZV

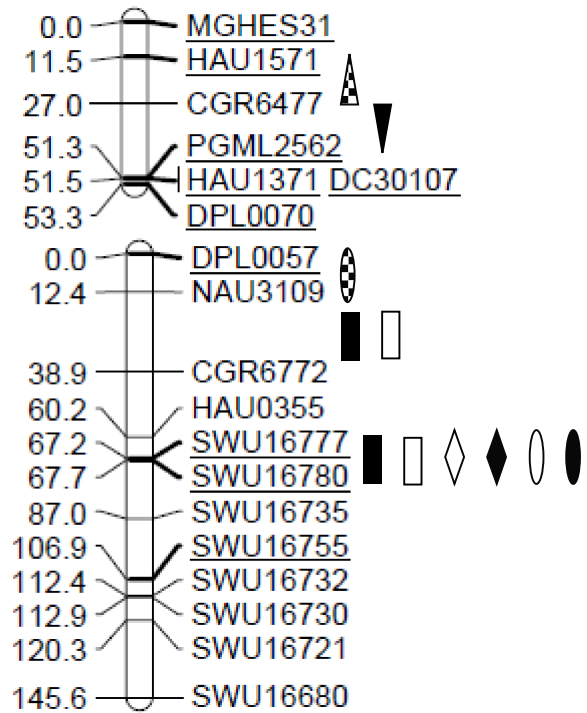

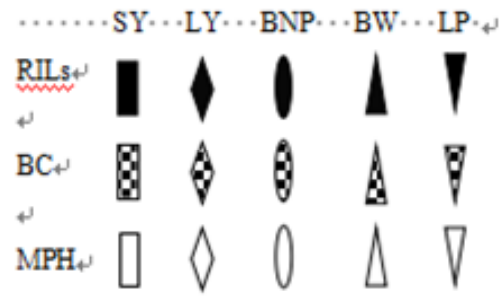

**Figure S1** Locations of QTLs controlling yield and yield component traits identified in two hybrids

SY: seed cotton yield; LY: lint yield; BNP: bolls per plant; BW: boll weight; LP: lint percent;

\* and \*\*, segregation distortion significant at  $P = 0.05$  and  $0.01$  levels, respectively.
